# Supplementary material
Source: HighWire-hosted journal article supplement (https://bmjopenrespres.bmj.com/content/6/1/e000374)
Supplement: inline-supplementary-material-1 [file inline-supplementary-material-1.xlsx]

## Sheet: Feuil1
CF patient	Sample	P. aeruginosa detection by qPCR and culture	P. aeruginosa numeration in culture (CFU/ml)	P. aeruginosa status*	Group**	Pulmotype	Gender	Sampling date	Patient's age at inclusion	CFTR mutation****	BETR	BMI	Antibiotic treatment	Epithelial cells (cells/field)	Leukocytes (cells/field)	Cytological score*****
006	1001	-	0	Free	2	A	female	2008.29.01	28	2	Exacerbation	MD***	No	< 10	> 25	3
006	1045	+	1000	Free	2	A	female	2009.09.06		2	Exacerbation	23.0469	Yes	< 10	< 25	2
013	1023	-	0	Free	2	A	male	2008.13.10	15	2	Baseline	17.9151	No	> 10	< 25	1
013	2327	+	1000000	Free	2	A	male	2010.25.02		2	Baseline	18.3768	No	< 10	> 25	3
016	2386	-	0	Never	2	A	male	2010.16.12	12	1	Recovery	16.6749	Yes	> 10	> 25	2
016	2424	+	800000	Never	2	A	male	2011.13.04		1	Baseline	14.4676	Yes	< 10	> 25	3
023	2212	-	0	Never	2	A	male	2009.19.11	10	2	Baseline	13.2002	Yes	< 10	> 25	3
023	2316	+	40	Never	2	C	male	2010.10.02		2	Baseline	11.8718	Yes	< 10	> 25	3
025	2179	-	0	Never	2	A	male	2009.19.08	13	3	Baseline	18.5568	No	> 10	< 25	1
025	2325	+	50000	Never	2	A	male	2010.25.02		3	Baseline	18.2531	No	< 10	> 25	3
030	2068	-	0	Free	2	A	male	2008.10.09	7	2	Baseline	17.5598	No	< 10	> 25	3
030	2104	+	1000	Free	2	A	male	2008.17.12		2	Baseline	17.5598	Yes	< 10	> 25	3
031	2015	+	1000000	Never	2	A	female	2008.03.11	12	1	Baseline	15.7333	No	< 10	> 25	1
031	2176	-	0	Never	2	A	female	2009.04.08		1	Baseline	16.8367	No	> 10	> 25	2
034	2364	-	0	Free	2	A	female	2009.04.03	20	1	Exacerbation	16.4366	Yes	MD***	> 25	MD***
034	2328	+	400	Free	2	A	female	2010.02.16		1	Recovery	17.2584	Yes	< 10	> 25	3
035	1262	-	0	Free	1	A	male	2009.04.11	8	1	Baseline	15.6791	Yes	> 10	< 25	2
035	2207	-	0	Never	1	A	male	2010.30.08		1	Baseline	13.2036	No	< 10	> 25	3
041	1403	-	0	Free	2	A	male	2011.23.06	17	1	MD***	20.9366	No	< 10	> 25	3
041	1553	+	100	Free	2	A	male	2011.08.09		1	MD***	20.9366	No	< 10	> 25	3
046	2352	-	0	Free	1	A	male	2010.18.06	14	2	MD***	MD***	Yes	< 10	> 25	3
046	2390	-	0	Free	1	A	male	2010.01.09		2	Baseline	18.3058	No	< 10	> 25	3
047	1284	+	10000000	Never	2	A	female	2011.26.04	6	2	Baseline	16.1506	No	> 10	< 25	2
047	2201	-	0	Never	2	A	female	2009.16.10		2	Baseline	15.1172	No	< 10	> 25	3
061	1540	+	0	Free	2	C	female	2011.31.08	9	1	Baseline	20.3428	No	MD***	MD***	MD***
061	2404	-	0	Free	2	C	female	2010.06.10		1	Baseline	18.048	Yes	< 10	> 25	3
065	1098	-	0	Free	2	C	male	2010.06.08	14	1	Baseline	18.5078	No	< 10	> 25	3
065	2419	+	400000	Free	2	A	male	2010.24.11	10	1	Baseline	20.0796	No	< 10	> 25	3
069	1036	-	0	Never	1	B	male	2009.03.02		1	Recovery	17.5697	No	MD***	> 25	MD***
069	2300	-	0	Never	1	C	male	2010.06.01		3	Baseline	13.9229	Yes	MD***	MD***	MD***
073	1082	-	0	Never	1	B	female	2009.03.12	15	2	Exacerbation	21.3333	No	< 10	< 25	2
073	1091	-	0	Never	1	B	female	2010.01.06		2	Recovery	21.0517	Yes	< 10	< 25	2
072	2175	-	0	Free	2	A	female	2009.04.08	14	1	Baseline	17.0096	No	> 10	> 25	2
072	2198	+	40000	Free	2	A	female	2009.13.10		1	Exacerbation	16.7604	Yes	> 10	< 25	1
070	1103	+	1000000	Never	2	B	female	2010.23.08		1	Baseline	17.5697	No	MD***	> 25	MD***
070	2322	+	10000	Free	2	B	female	2010.24.02	10	1	Baseline	15.2279	No	< 10	> 25	3
076	2337	-	0	Free	2	B	female	2010.14.04		1	Baseline	17.4684	No	< 10	> 25	3
076	2360	+	1000	Free	2	B	female	2010.07.07		1	Baseline	17.1855	No	< 10	> 25	3
077	2357	-	0	Free	1	B	male	2010.05.07	20	1	Baseline	18.5132	No	MD***	> 25	MD***
077	2367	-	0	Free	1	A	male	2010.08.03		1	Baseline	21.7051	No	< 10	> 25	3
078	2353	-	0	Free	2	A	male	2010.28.06	8	1	Baseline	15.0819	No	< 10	> 25	3
078	2401	+	100	Free	2	A	male	2010.29.09		1	Baseline	15.2778	No	< 10	> 25	3
208	3032	-	0	Never	1	A	female	2008.26.11	8	1	Baseline	15.1172	Yes	< 10	> 25	3
208	3202	-	0	Never	1	A	female	2010.23.06		1	Baseline	15.0368	Yes	> 10	< 25	1
217	3016	-	0	Free	1	A	male	2008.24.09	10	2	Baseline	17.3579	No	< 10	> 25	3
217	3223	-	0	Free	1	A	male	2010.01.09		2	Baseline	18.2563	Yes	< 10	> 25	3
223	3125	-	0	Never	2	B	male	2009.23.09	9	1	Baseline	15.36	No	> 10	> 25	2
223	3141	+	10000	Never	2	A	male	2009.09.12		1	Baseline	15.1172	No	> 10	> 25	2
226	3199	-	0	Free	1	A	female	2010.14.06	12	1	Baseline	15.5896	No	> 10	> 25	2
226	3224	-	0	Free	1	C	female	2010.01.09		1	Baseline	15.6226	No	> 10	> 25	2
233	3272	-	0	Never	1	A	male	2011.27.06	19	1	Baseline	17.8553	Yes	> 10	> 25	2
233	3290	-	0	Never	1	A	male	2011.21.02		1	Baseline	17.0901	Yes	< 10	> 25	3
240	3055	-	0	Never	2	A	female	2009.20.02	27	3	Baseline	20.3223	No	< 10	> 25	3
240	3075	+	100	Never	2	A	female	2009.17.04		3	Baseline	23.5883	No	< 10	> 25	3
243	3173	-	0	Free	1	C	female	2010.10.03	9	1	Baseline	16.0698	No	< 10	> 25	3
243	3273	-	0	Free	1	C	female	2011.08.03		1	Baseline	15.6791	No	< 10	> 25	3
244	3077	-	0	Free	1	A	female	2009.28.04	8	1	Baseline	14.3495	Yes	> 10	> 25	2
251	3081	-	0	Free	1	C	female	2009.05.05	15	1	Baseline	15.1489	Yes	< 10	> 25	3
251	3154	-	0	Free	1	C	female	2010.05.01		1	Baseline	15.1796	Yes	< 10	> 25	3
253	3118	-	0	Never	2	A	male	2009.16.09	9	2	Baseline	15.9122	No	> 10	< 25	1
253	3157	+	1000	Never	2	B	male	2010.06.01		2	Baseline	16.4609	No	> 10	> 25	2
254	3138	-	0	Free	1	A	female	2009.02.12	7	2	Baseline	16.1247	Yes	> 10	> 25	2
254	3178	-	0	Free	1	A	female	2010.24.03		2	Baseline	17.1855	Yes	> 10	> 25	2
256	3168	-	0	Never	2	A	male	2010.01.03	29	1	Exacerbation	16.7573	Yes	> 10	> 25	2
256	3247	+	1000	Never	2	A	male	2010.29.11		1	Baseline	16.7573	Yes	< 10	> 25	3
* Status "Free" and "Never": According to Lee’s definition
** group 1: patients who remained free for P. aeruginosa, group 2: patients who became positive culture for P. aeruginosa during the follow-up
*** MD: missing data
**** CFTR genotype: 1, delF508 homozygous; 2, delF508 heterozygous; 3, others
***** Cytological score: poor quality for score 1; moderate quality for score 2; appropriate quality for score 3
